# Supplementary material
Source: PubMed Central journal article supplement (PMC3190574)
Supplement: NIHMS309143-supplement-2.pdf [file NIHMS309143-supplement-2.pdf]

### 3. Second round nested PCR for VDJ

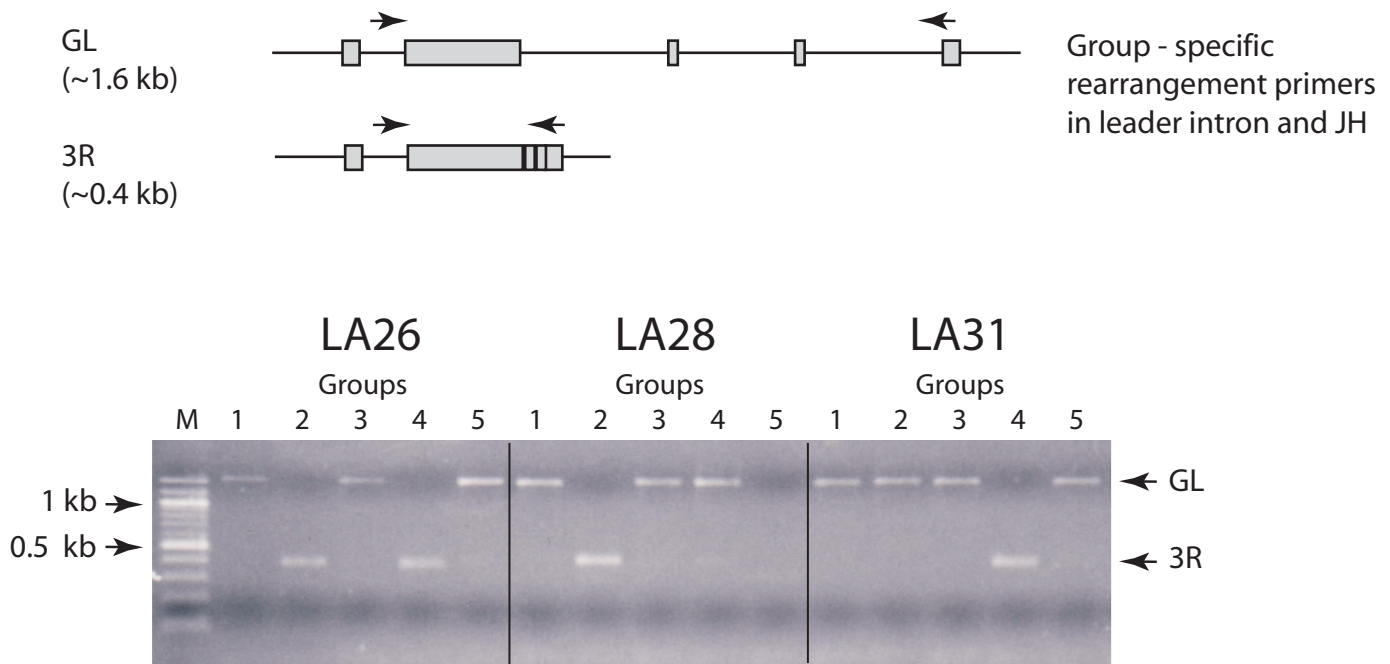

### 4. Second round nested PCR for GL

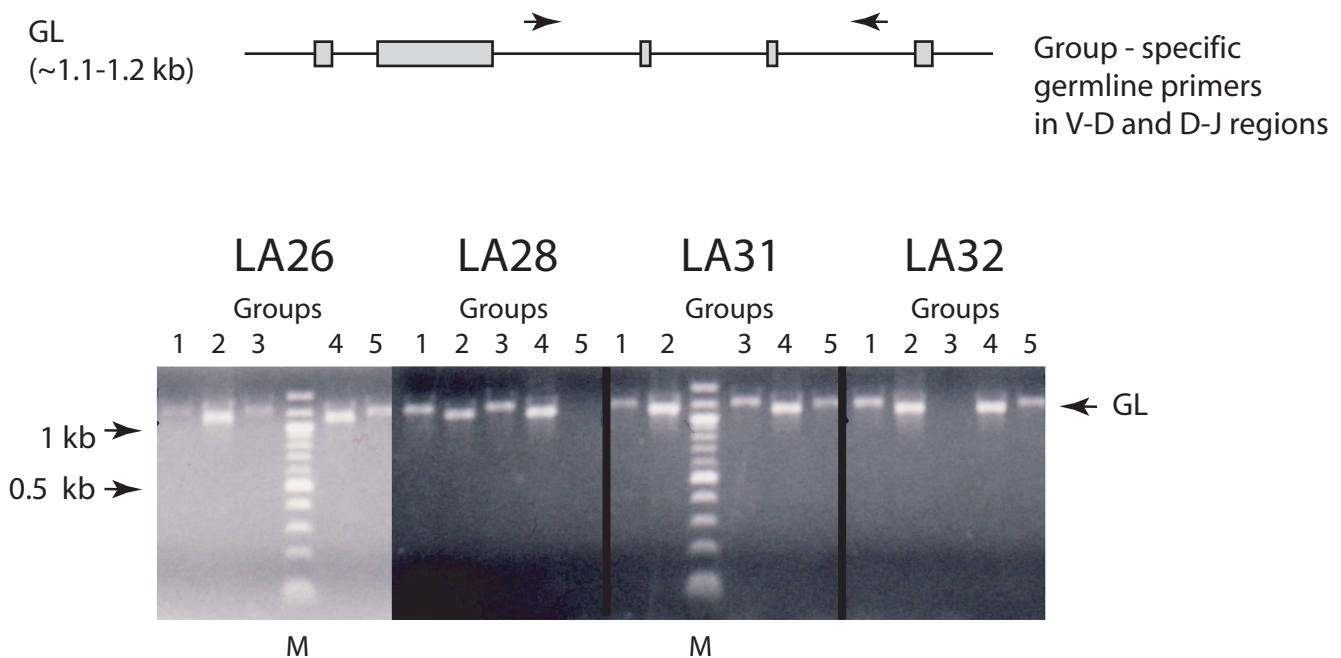

Supplemental Figure S1. Illustrations of two nested reactions for the single-cell genomic PCR. Step 3: Second round nested PCR with subfamily-specific forward primers reveal the identity of GL and VDJ (3R) sequences amplified in the B cell. Step 4: Second round nested PCR for GL takes place in the inter-segmental regions that are undeleted when not rearranged.
