# Supplementary material
Source: PubMed Central journal article supplement (PMC3190574)
Supplement: NIHMS309143-supplement-4.pdf [file NIHMS309143-supplement-4.pdf]

Fig. S3. All single sIgM-positive cells assayed

| Cells with $\geq 6$ IgH defined            |          |                |                |        |                |                |                |        |                |          |                |
|--------------------------------------------|----------|----------------|----------------|--------|----------------|----------------|----------------|--------|----------------|----------|----------------|
| Cell                                       | G1       | G2A            | G2B            | G3     | G4A            | G4D            | G4D2           | G4CG   | G5             | VDJ+     | IgH detected   |
| LA5                                        | GL       | GL             | GL             | 0      | 0              | GL             | 0              | VDJ+/0 | GL             | G4CG     | 6/9, 1 VDJ     |
| LA14                                       | GL       | VDJ+/GL        | GL             | GL     | GL             | GL             | VDJ $\phi$ /0  | 0      | 0              | G2A      | 7/9, 2 VDJ     |
| LA16                                       | GL       | VDJ $\phi$ /GL | GL             | 0      | 0              | GL             | GL             | VDJ+/0 | GL             | G4CG     | 6/9, 2 VDJ     |
| LA17                                       | GL       | VDJ $\phi$ /GL | VDJ+/GL        | GL     | GL             | GL             | GL             | GL     | VDJ $\phi$ /GL | G2B      | 9/9, 3 VDJ     |
| LA18                                       | GL       | GL             | VDJ+/GL        | GL     | 0              | GL             | 0              | GL     | GL             | G2B      | 7/9, 1 VDJ     |
| LA23                                       | GL       | GL             | GL             | 0      | GL             | 0              | 0              | VDJ+/0 | GL             | G4CG     | 6/9, 1 VDJ     |
| LA24                                       | GL       | 0              | VDJ+/GL        | 0      | GL             | GL             | GL             | 0      | GL             | G2B      | 6/9, 1 VDJ     |
| LA26                                       | GL       | GL             | VDJ $\phi$ /GL | GL     | VDJ $\phi$ /GL | GL             | VDJ+/GL        | 0      | GL             | G4D      | 8/9, 3 VDJ     |
| LA27                                       | GL       | VDJ+/GL        | GL             | GL     | GL             | GL             | 0              | GL     | 0              | G2A      | 7/9, 1 VDJ     |
| LA28                                       | GL       | GL             | VDJ $\phi$ /0  | GL     | GL             | GL             | GL             | 0      | 0              | none     | 7/9, 1 VDJ     |
| LA31                                       | GL       | GL             | GL             | GL     | GL             | VDJ $\phi$ /GL | GL             | 0      | GL             | none     | 8/9, 1 VDJ     |
| LA32                                       | GL       | GL             | VDJ $\phi$ /GL | 0      | 0              | GL             | VDJ+/0         | GL     | GL             | G4D      | 6/9, 2 VDJ     |
| LA33                                       | GL       | VDJ+/GL        | GL             | GL     | 0              | VDJ $\phi$ /GL | VDJ $\phi$ /GL | GL     | GL             | G2A      | 8/9, 3 VDJ     |
| LA36                                       | GL       | GL             | 0              | GL     | GL             | GL             | VDJ+/0         | 0      | VDJ $\phi$ /GL | G4D      | 7/9, 2 VDJ     |
| LA37                                       | GL       | VDJ $\phi$ /GL | 0              | VDJ+/0 | 0              | GL             | VDJ $\phi$ /GL | GL     | GL             | G3       | 7/9, 3 VDJ     |
| LA46                                       | V-DDJ/0  | VDJ+/GL        | GL             | GL     | 0              | GL             | VDJ+/GL        | 0      | GL             | G2A, G4D | 7/9, 2 VDJ, 2R |
| Cells with $< 6$ IgH defined               |          |                |                |        |                |                |                |        |                |          |                |
| Cell                                       | G1       | G2A            | G2B            | G3     | G4A            | G4D            | G4D2           | G4CG   | G5             | VDJ+     | IgH detected   |
| LA1                                        | GL       | 0              | VDJ+/GL        | 0      | 0              | 0              | 0              | 0      | 0              | G2B      | 2/9, 1 VDJ     |
| LA2                                        | GL       | GL             | 0              | 0      | VDJ $\phi$ /0  | GL             | 0              | 0      | GL             | none     | 5/9, 1 VDJ     |
| LA12                                       | GL       | GL             | VDJ+/0         | 0      | 0              | 0              | GL             | 0      | 0              | G2B      | 3/9, 1 VDJ     |
| LA25                                       | 0        | 0              | VDD-J/GL       | GL     | 0              | GL             | 0              | GL     | GL             | none     | 5/9, 2R        |
| LA34                                       | V-DD-J/0 | 0              | GL             | 0      | 0              | GL             | VDJ $\phi$ /0  | 0      | 0              | none     | 4/9, 1 VDJ, 1R |
| LA43                                       | GL       | VDJ $\phi$ /0  | VDJ+/0         | 0      | 0              | 0              | 0              | 0      | V-DDJ/0        | G2B      | 4/9, 2 VDJ, 2R |
| LA48                                       | GL       | GL             | GL             | 0      | 0              | 0              | GL             | VDJ+/0 | 0              | G4CG     | 5/9, 1 VDJ     |
| LA52                                       | 0        | VDJ+/0         | GL             | 0      | 0              | 0              | 0              | 0      | 0              | G2A      | 2/9, 1 VDJ     |
| Cells without any rearrangements detected* |          |                |                |        |                |                |                |        |                |          |                |
| Cell                                       | G1       | G2A            | G2B            | G3     | G4A            | G4D            | G4D2           | G4CG   | G5             | VDJ+     | IgH detected   |
| LA7                                        | 0        | 0              | 0              | 0      | 0              | GL             | 0              | GL     | 0              | none     | 2/9            |
| LA8                                        | GL       | 0              | GL             | 0      | GL             | 0              | 0              | 0      | GL             | none     | 4/9            |
| LA35                                       | GL       | GL             | 0              | 0      | 0              | 0              | 0              | GL     | 0              | none     | 3/9            |
| LA38                                       | GL       | 0              | GL             | 0      | 0              | 0              | GL             | 0      | 0              | none     | 3/9            |
| LA39                                       | GL       | 0              | GL             | 0      | 0              | GL             | 0              | 0      | GL             | none     | 4/9            |
| LA40                                       | GL       | 0              | 0              | GL     | 0              | 0              | 0              | GL     | 0              | none     | 3/9            |
| LA41                                       | 0        | GL             | GL             | 0      | 0              | 0              | 0              | 0      | 0              | none     | 2/9            |
| LA45                                       | GL       | 0              | GL             | 0      | 0              | 0              | GL             | 0      | 0              | none     | 3/9            |
| LA47                                       | 0        | GL             | GL             | 0      | 0              | 0              | 0              | 0      | 0              | none     | 2/9            |
| LA49                                       | GL       | GL             | GL             | GL     | GL             | 0              | 0              | 0      | GL             | none     | 6/9            |
| LA53                                       | 0        | GL             | 0              | 0      | 0              | 0              | GL             | 0      | GL             | none     | 3/9            |
| LA54                                       | 0        | GL             | GL             | 0      | 0              | 0              | 0              | 0      | GL             | none     | 3/9            |

\*sIgM-positive cells where no VDJ was amplified in the nested reactions. These were selected using the same criterion as all the other lymphocyte samples, that flanking RBC GL signals were obtained.
